# Supplementary material for: A Comprehensive Phylogenetic and Bioinformatics Survey of Lectins in the Fungal Kingdom
Source: MDPI journal article supplement (doi:10.3390/jof7060453), 2021-06-07
Supplement: s1 [file s1]

## Supplementary data

### A Comprehensive Phylogenetic and Bioinformatics Survey of Lectins in the Fungal kingdom

Annie Lebreton, François Bonnardel, Yu-Cheng Dai, Anne Imberty, Francis M. Martin, Frédérique Lisacek

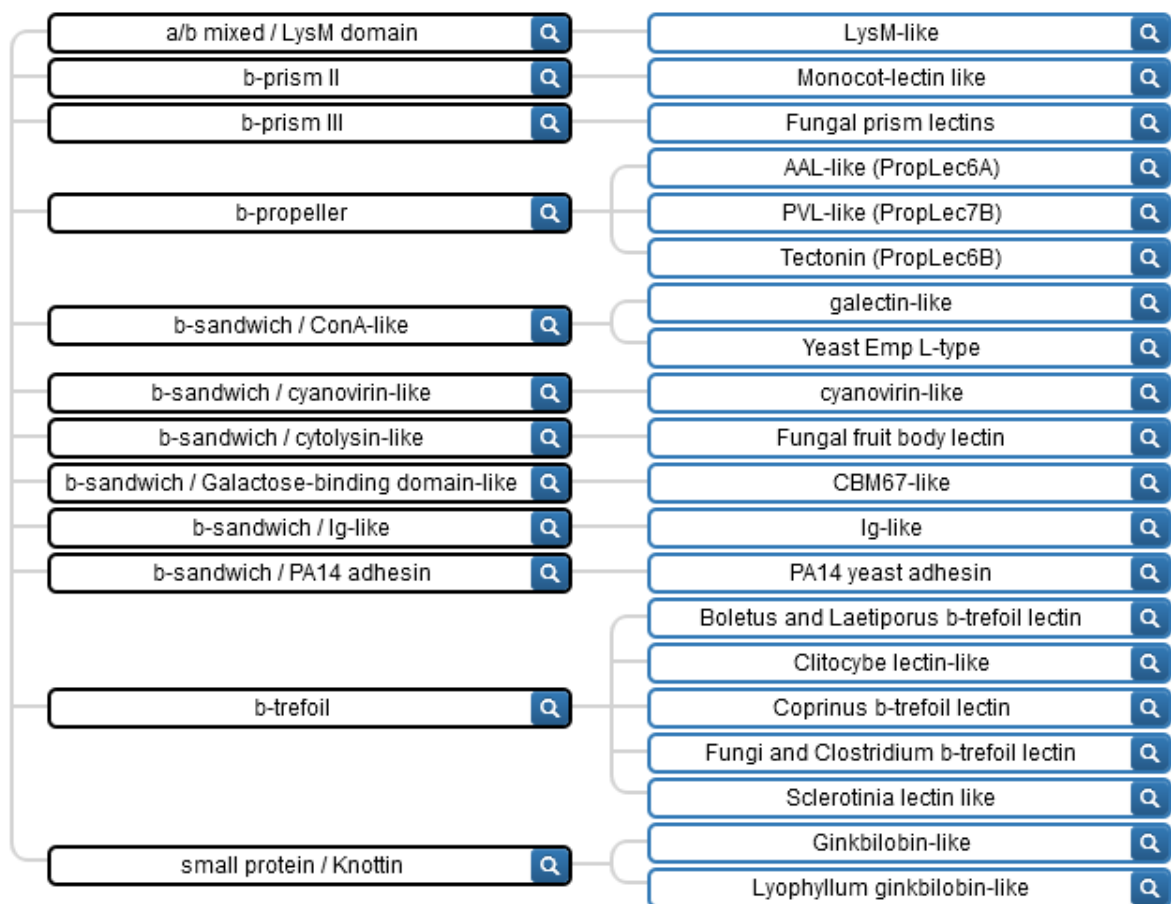

**Figure S1:** Distribution of lectin folds and classes of fungal lectin with 3D structures in Unilectin3D database.

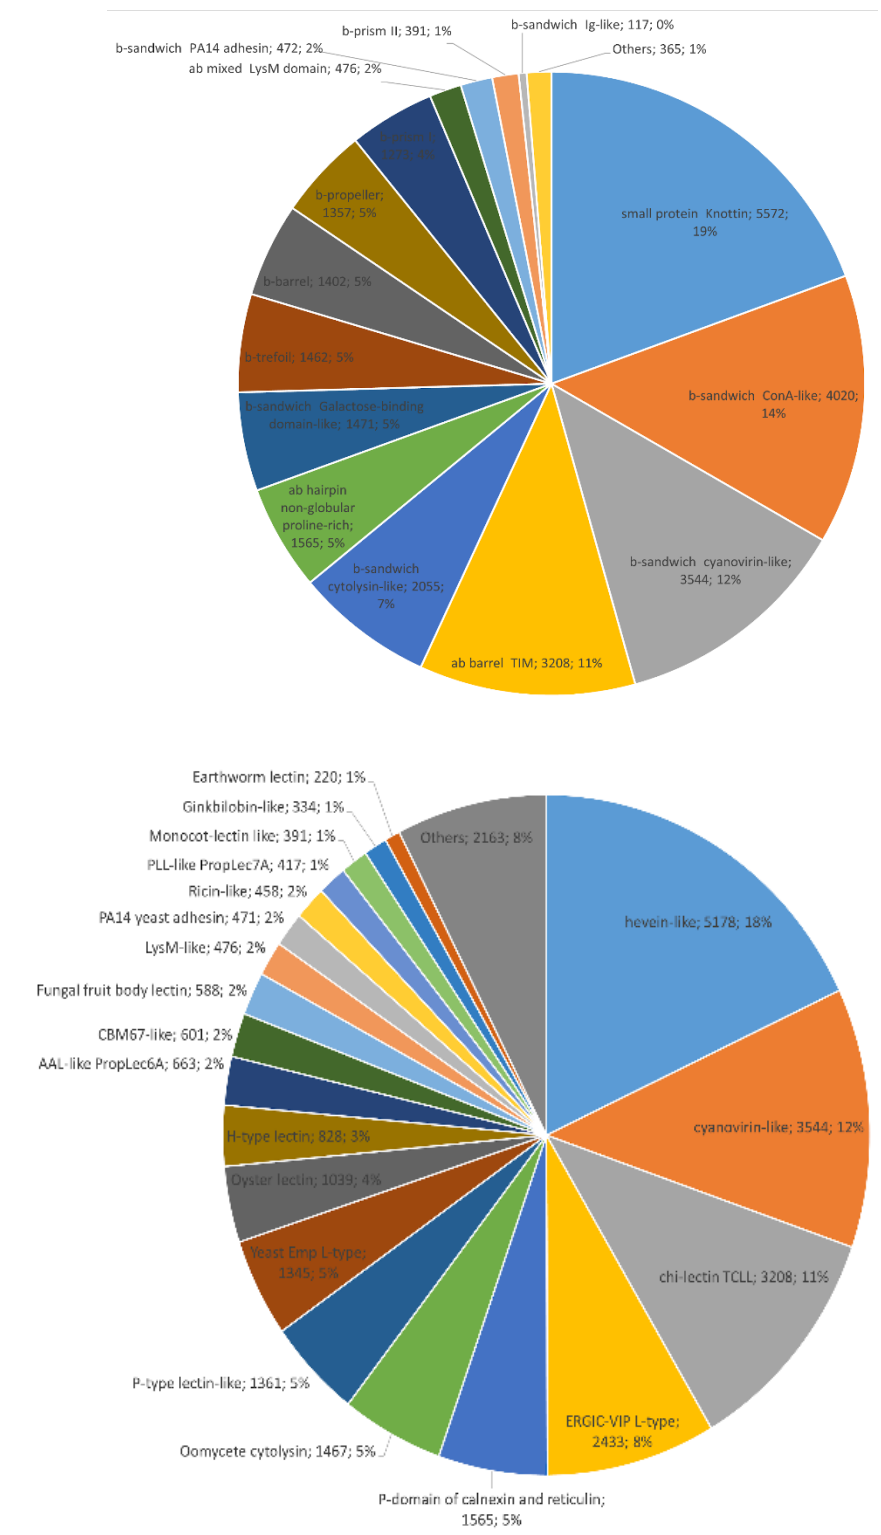

**Figure S2:** Distribution of folds (left) and classes (right) of predicted lectin sequences in MycoLec. Only lectin sequences with a similarity score > 25% were used.

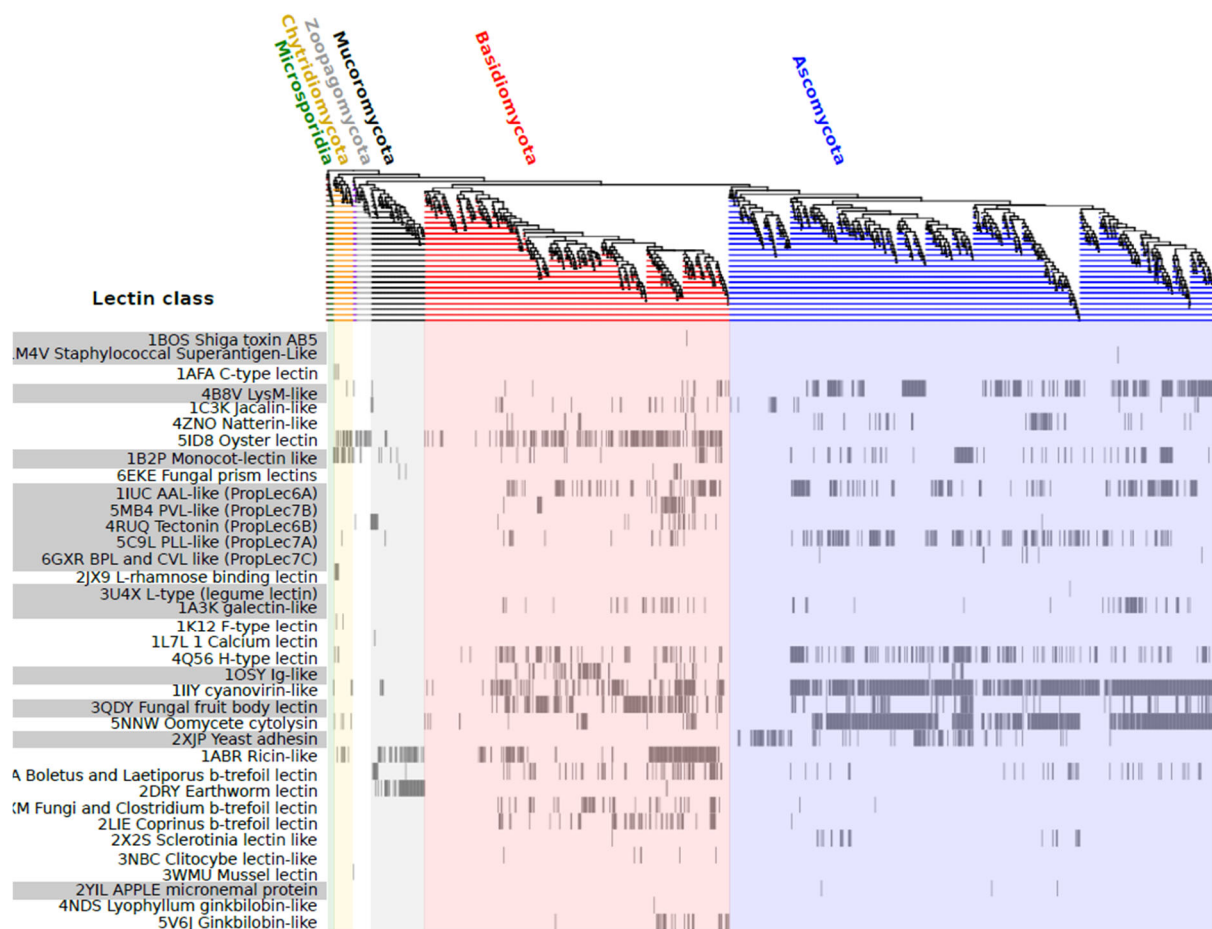

**Figure S3: Distribution of predicted lectins by species in MycoLec.** Each vertical line corresponds to a fungal strain organized according to their phylogenetic relationship as displayed by the tree. Left, Clustering of lectin classes. Lectins with a similarity score > 25% were used to detect the presence of the different lectin classes found in the MycoCosm genomes.

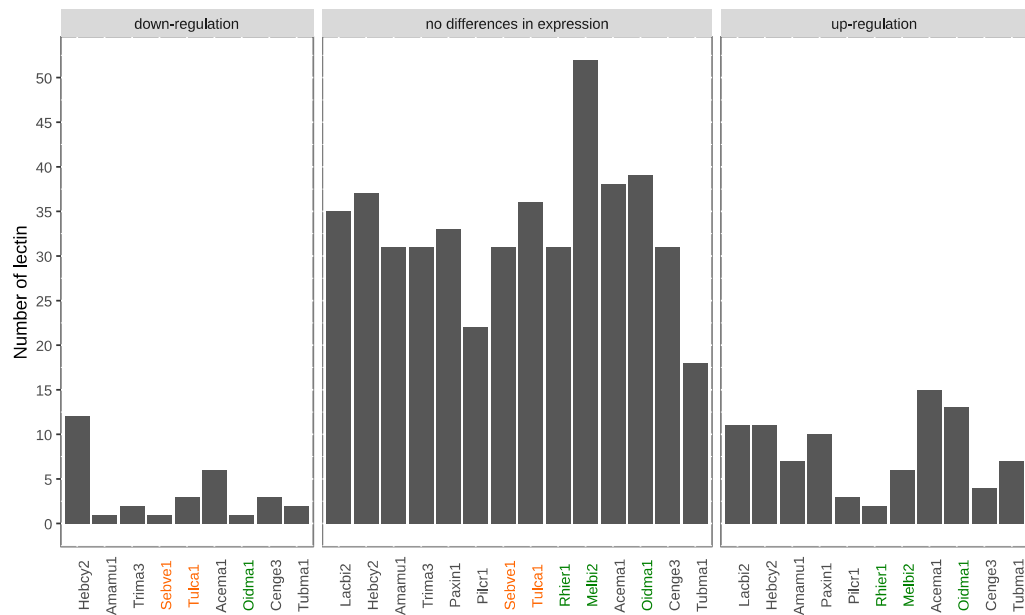

**Figure S4: Impact of mycorrhization of 14 fungal strains with their corresponding host plant on lectin expression.** Each bar corresponds to a strain annotated by a tag used in the MycoCosm database to refer to the specific strain and genomic assembly. Tags are colored according to the mycorrhizae type: grey ectomycorrhizae, green ericoid mycorrhizae, orange orchid mycorrhizae.

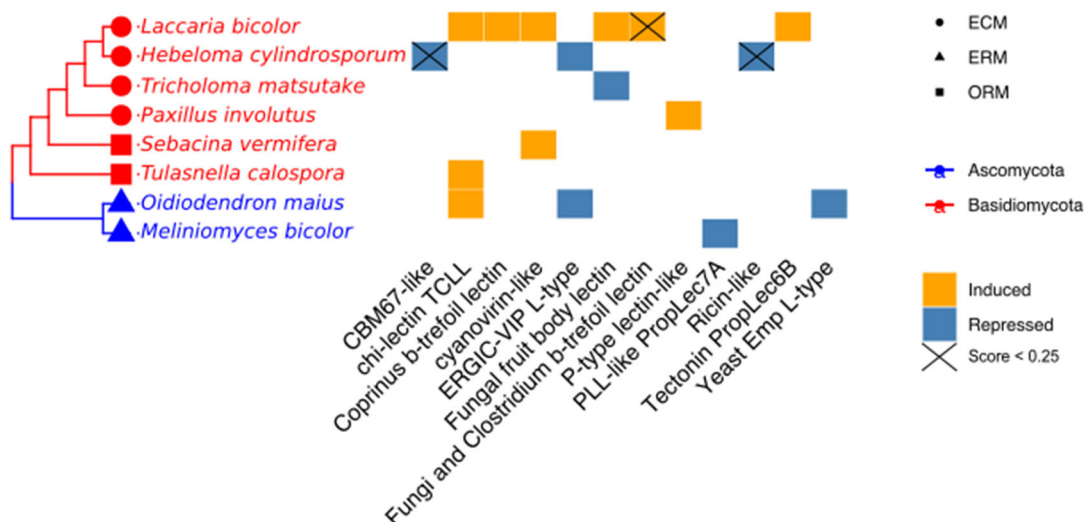

**Figure S5: Differential expression of lectins within mycorrhizal fungi upon plants interaction.** Lectins with invariable expression are not represented. Three species are ericoid mycorrhizae (ERM), two are orchids mycorrhizae (ORM) and the other are ectomycorrhizae (ECM).

**Table S1: Fungal species investigated in the exploration of the lectins induced and repressed during their mycorrhization with a compatible plant host.** ECM: ectomycorrhizae, ORM: orchids mycorrhizae, ERM: ericoid mycorrhizae

| JGI ID | Fungal species                    | Plant host                         | Analysis Method | Mycorrhizae type | Ref |
|--------|-----------------------------------|------------------------------------|-----------------|------------------|-----|
| Amamu1 | <i>Amanita muscaria</i>           | <i>Populus tremula tremoloides</i> | CLC             | ECM              | [1] |
| Hebcy2 | <i>Hebeloma cylindrosporum</i>    | <i>Pinus pinaster</i>              | CLC             | ECM              | [1] |
| Paxin1 | <i>Paxillus involutus</i>         | <i>Fagus sylvatica</i>             | CLC             | ECM              | [1] |
| Pilcr1 | <i>Piloderma croeus</i>           | <i>Quercus robur</i>               | CLC             | ECM              | [1] |
| Oidma1 | <i>Oidiodendron maius</i>         | <i>Vaccinium myrtillus</i>         | CLC             | ERM              | [1] |
| Sebve1 | <i>Sebacina vermifera</i>         | <i>Arabidopsis thaliana</i>        | CLC             | ORM              | [1] |
| Tulca1 | <i>Tulasnella calosporra</i>      | <i>Serapias vomeracea</i>          | CLC             | ORM              | [1] |
| Melbi2 | <i>Meliniomyces bicolor</i>       | <i>Vaccinium myrtillus</i>         | CLC             | ERM              | [2] |
| Rhier1 | <i>Rhizoscyphus ericaceae</i>     | <i>Vaccinium myrtillus</i>         | CLC             | ERM              | [2] |
| Tubma1 | <i>Tuber magnatum</i>             | <i>Quercus robur</i>               | CLC             | ECM              | [3] |
| Cenge3 | <i>Cenococcum geophilum</i>       | <i>Pinus sylvestris</i>            | CLC             | ECM              | [4] |
| Acema1 | <i>Acephala macrosclerotiorum</i> | <i>Pinus sylvestris</i>            | HISAT/ DESeq2   | ECM              | [5] |
| Lacbi2 | <i>Laccaria bicolor</i>           | <i>Populus tremula x alba</i>      | HISAT/DESeq2    | ECM              | [6] |
| Trima3 | <i>Tricholoma matsutake</i>       | <i>Pinus sylvestris</i>            | CLC             | ECM              | [5] |

**Table S2: Lectin content in the predicted proteomes of the Agaricomycetes fungal class sorted by ecological niche.**

|                                       | LysM-like      | Jacalin-like | Natterin-like | Monocot-lectin like | Fungal prism lectins | AAL-like PropLec6A | PLL-like PropLec7A | PVL-like PropLec7B | Tectonin PropLec6B | galectin-like | Physarum lectin | Yeast Emp L-type | cyanovirin-like | Fungal fruit body lectin | Oomycete cytolysin | CBM67-like | H-type lectin | Ig-like | Boletus and Laetiporus b-trefoil | Clitocybe lectin-like | Coprinus b-trefoil lectin | Earthworm lectin | Fungi and Clostridium b-trefoil | Ricin-like | Ginkbilobin-like | hevein-like | Lyophyllum ginkbilobin-like |
|---------------------------------------|----------------|--------------|---------------|---------------------|----------------------|--------------------|--------------------|--------------------|--------------------|---------------|-----------------|------------------|-----------------|--------------------------|--------------------|------------|---------------|---------|----------------------------------|-----------------------|---------------------------|------------------|---------------------------------|------------|------------------|-------------|-----------------------------|
| <b>Endophyte</b>                      | <b>classes</b> |              |               |                     |                      |                    |                    |                    |                    |               |                 |                  |                 |                          |                    |            |               |         |                                  |                       |                           |                  |                                 |            |                  |             |                             |
| <i>Piriformospora indica</i>          | 5              |              |               |                     |                      |                    |                    |                    |                    |               |                 |                  |                 | 3                        |                    |            |               |         |                                  |                       |                           |                  |                                 |            |                  | 8           | 2                           |
| <b>Orchid mycorrhizae</b>             | <b>0</b>       |              |               |                     |                      |                    |                    |                    |                    |               |                 |                  |                 |                          |                    |            |               |         |                                  |                       |                           |                  |                                 |            |                  |             |                             |
| <i>Sebacina vermifera</i>             | 1              |              |               |                     |                      |                    |                    |                    |                    | 1             | 1               | 2                |                 |                          |                    |            |               |         |                                  | 2                     |                           |                  |                                 |            |                  | 7           | 5                           |
| <i>Tulasnella calospora</i>           |                |              |               |                     |                      | 1                  |                    |                    |                    |               |                 |                  | 1               |                          |                    |            | 6             |         |                                  |                       | 3                         | 1                | 1                               |            |                  |             | 13                          |
| <b>Ectomycorrhizae</b>                | <b>0</b>       |              |               |                     |                      |                    |                    |                    |                    |               |                 |                  |                 |                          |                    |            |               |         |                                  |                       |                           |                  |                                 |            |                  |             |                             |
| <i>Amanita muscaria</i>               |                |              |               |                     |                      |                    |                    |                    |                    |               |                 |                  |                 |                          |                    | 5          | 3             | 3       |                                  |                       |                           | 1                |                                 |            |                  |             | 12                          |
| <i>Amanita rubescens</i>              |                |              |               |                     |                      |                    |                    | 3                  | 6                  |               |                 |                  |                 | 1                        |                    | 11         | 6             |         |                                  | 4                     | 1                         |                  |                                 |            |                  |             | 32                          |
| <i>Boletus edulis</i>                 |                |              |               |                     |                      |                    |                    |                    |                    |               |                 |                  |                 | 9                        |                    |            | 3             |         | 3                                |                       | 5                         |                  |                                 |            |                  |             | 20                          |
| <i>Cantharellus anzutake</i>          |                |              |               |                     |                      |                    |                    |                    | 2                  |               |                 |                  | 1               |                          |                    |            |               |         |                                  |                       |                           |                  |                                 |            |                  |             | 3                           |
| <i>Cortinarius glaucopus</i>          |                |              |               |                     |                      | 4                  |                    | 5                  | 4                  |               |                 | 1                |                 |                          |                    |            | 4             |         | 1                                |                       |                           |                  |                                 | 1          | 1                |             | 21                          |
| <i>Gautieria morchelliformis</i>      |                |              |               |                     |                      |                    | 6                  |                    |                    |               |                 | 1                |                 |                          |                    |            |               | 2       |                                  |                       |                           |                  |                                 |            |                  |             | 10                          |
| <i>Gyrodon lividus</i>                |                |              |               |                     |                      |                    |                    |                    |                    |               |                 |                  | 1               | 8                        |                    |            | 3             |         |                                  |                       |                           |                  |                                 |            |                  |             | 12                          |
| <i>Hebeloma cylindrosporum</i>        |                |              |               |                     |                      |                    | 1                  | 3                  | 10                 | 1             |                 |                  | 1               | 2                        |                    |            |               |         |                                  |                       |                           |                  |                                 |            | 2                |             | 20                          |
| <i>Hydnum rufescens</i>               |                |              |               |                     |                      |                    |                    |                    |                    |               |                 |                  |                 |                          |                    |            |               |         |                                  |                       | 3                         |                  |                                 |            |                  |             | 3                           |
| <i>Hysterangium stoloniferum</i>      |                |              |               |                     |                      | 1                  |                    |                    |                    |               |                 | 1                |                 |                          |                    |            | 3             |         |                                  |                       |                           |                  |                                 |            |                  |             | 5                           |
| <i>Laccaria amethystina</i>           |                |              |               |                     |                      |                    |                    | 3                  | 5                  | 5             | 2               |                  |                 | 1                        |                    |            |               |         |                                  |                       | 4                         |                  |                                 |            |                  |             | 20                          |
| <i>Laccaria bicolor</i>               |                |              |               |                     |                      |                    |                    | 1                  | 3                  | 2             | 2               |                  | 1               | 1                        |                    |            |               |         | 1                                |                       | 3                         |                  |                                 |            |                  |             | 14                          |
| <i>Lactarius quietus</i>              |                |              |               |                     |                      |                    |                    |                    |                    |               |                 | 1                | 4               |                          |                    |            | 11            |         |                                  |                       |                           |                  |                                 |            |                  |             | 16                          |
| <i>Melanogaster broomeianus</i>       |                |              |               |                     |                      |                    |                    |                    |                    | 2             |                 |                  |                 | 2                        |                    |            |               |         |                                  |                       |                           |                  |                                 |            |                  |             | 4                           |
| <i>Paxillus adelphus</i>              |                |              |               |                     |                      |                    |                    |                    | 1                  |               |                 |                  |                 | 3                        |                    |            |               |         |                                  |                       |                           |                  |                                 |            |                  |             | 4                           |
| <i>Paxillus ammoniavirescens</i>      |                |              |               |                     |                      |                    |                    |                    |                    |               |                 |                  |                 | 5                        |                    |            | 3             |         |                                  |                       |                           |                  |                                 |            |                  |             | 8                           |
| <i>Paxillus involutus</i>             |                |              |               |                     |                      |                    |                    |                    |                    |               | 5               |                  |                 | 8                        |                    |            | 4             |         |                                  |                       |                           |                  |                                 |            |                  |             | 17                          |
| <i>Piloderma croceum</i>              |                |              |               |                     |                      |                    |                    |                    |                    |               |                 | 1                | 1               |                          |                    |            |               |         |                                  |                       |                           |                  | 1                               |            |                  |             | 3                           |
| <i>Pisolithus tinctorius</i>          |                |              |               |                     |                      |                    |                    |                    |                    |               |                 |                  | 4               |                          |                    |            |               |         |                                  |                       |                           |                  |                                 |            |                  |             | 4                           |
| <i>Rhizopogon vesiculosus</i>         |                |              |               |                     |                      | 1                  |                    |                    |                    |               |                 |                  |                 | 1                        |                    |            |               |         |                                  | 4                     | 4                         |                  |                                 |            |                  |             | 10                          |
| <i>Rhizopogon vinicolor</i>           |                |              |               |                     |                      | 1                  |                    |                    |                    |               |                 |                  |                 | 1                        |                    |            |               |         |                                  |                       | 4                         | 4                |                                 |            |                  |             | 10                          |
| <i>Russula ochroleuca</i>             |                |              |               |                     |                      |                    |                    |                    |                    |               |                 |                  |                 | 2                        |                    |            | 2             |         |                                  |                       |                           |                  |                                 |            |                  |             | 4                           |
| <i>Scleroderma citrinum</i>           |                |              |               |                     |                      |                    |                    |                    |                    |               |                 |                  | 20              |                          |                    |            |               |         |                                  |                       |                           |                  |                                 |            |                  |             | 20                          |
| <i>Suillus brevipes</i>               |                |              |               |                     |                      | 2                  |                    |                    |                    |               |                 |                  |                 | 1                        |                    |            |               |         |                                  | 1                     |                           |                  |                                 |            |                  |             | 4                           |
| <i>Suillus luteus</i>                 |                |              |               |                     |                      | 2                  |                    |                    |                    |               |                 |                  |                 | 1                        |                    |            |               |         |                                  |                       |                           |                  |                                 |            |                  |             | 3                           |
| <i>Thelephora ganbajun</i>            |                |              |               |                     |                      |                    |                    |                    |                    |               |                 |                  |                 |                          |                    |            |               |         | 4                                |                       |                           |                  |                                 |            |                  |             | 4                           |
| <i>Thelephora terrestris</i>          |                |              |               |                     |                      | 5                  |                    |                    |                    |               |                 |                  |                 | 1                        |                    |            |               |         |                                  |                       |                           |                  |                                 |            |                  |             | 6                           |
| <i>Tricholoma matsutake</i>           |                |              |               |                     |                      |                    |                    |                    |                    | 1             |                 |                  |                 | 1                        |                    |            |               |         | 1                                |                       |                           |                  |                                 |            |                  |             | 3                           |
| <i>Xerocomus badius/Imleria badia</i> |                |              |               |                     |                      |                    |                    |                    |                    | 2             | 2               |                  | 1               | 2                        |                    |            | 2             |         | 1                                | 1                     | 8                         |                  |                                 |            |                  |             | 19                          |
| <b>Grass decayer</b>                  | <b>0</b>       |              |               |                     |                      |                    |                    |                    |                    |               |                 |                  |                 |                          |                    |            |               |         |                                  |                       |                           |                  |                                 |            |                  |             |                             |
| <i>Agaricus bisporus</i>              |                |              |               |                     |                      |                    |                    |                    |                    |               |                 |                  |                 | 1                        |                    |            |               |         |                                  |                       |                           |                  | 2                               | 2          |                  | 5           | 3                           |
| <i>Amanita thiersii</i>               |                |              |               |                     |                      |                    |                    |                    |                    | 1             | 1               |                  |                 |                          |                    | 2          |               |         |                                  |                       |                           |                  |                                 |            |                  | 6           | 10                          |
| <b>Litter decayer</b>                 | <b>0</b>       |              |               |                     |                      |                    |                    |                    |                    |               |                 |                  |                 |                          |                    |            |               |         |                                  |                       |                           |                  |                                 |            |                  |             |                             |
| <i>Ceriporiopsis (Gelatoporia)</i>    |                |              | 4             |                     |                      |                    |                    |                    |                    |               |                 | 1                |                 |                          |                    |            |               | 1       |                                  |                       |                           |                  |                                 |            |                  |             | 6                           |
| <i>Coprinellus micaceus</i>           |                |              |               |                     |                      |                    |                    | 11                 |                    |               |                 |                  | 11              |                          |                    |            |               |         | 1                                |                       |                           |                  |                                 | 3          | 2                | 2           | 41                          |
| <i>Coprinopsis cinerea</i>            |                |              |               |                     |                      |                    |                    | 2                  |                    | 6             |                 |                  |                 |                          |                    |            | 5             |         |                                  | 4                     | 4                         |                  |                                 | 4          |                  |             | 25                          |
| <i>Coprinopsis marcescibilis</i>      |                |              |               |                     |                      |                    |                    | 3                  |                    | 6             |                 | 1                |                 |                          |                    |            |               |         |                                  |                       |                           |                  |                                 | 3          | 5                |             | 18                          |
| <i>Fibularhizoctonia sp.</i>          |                |              |               |                     |                      |                    |                    |                    |                    |               |                 |                  | 2               | 20                       |                    |            | 7             |         | 1                                |                       | 1                         |                  |                                 | 1          |                  |             | 32                          |
| <i>Gymnopus androsaceus</i>           | 1              |              |               |                     |                      | 2                  |                    |                    |                    |               |                 |                  | 5               | 1                        |                    | 1          | 3             |         |                                  |                       |                           |                  | 1                               |            | 6                |             | 20                          |
| <i>Gymnopus luxurians</i>             |                |              |               | 7                   |                      |                    |                    |                    |                    |               |                 | 1                | 10              | 3                        |                    | 6          |               |         |                                  |                       |                           | 1                |                                 | 1          | 4                |             | 33                          |
| <i>Leucoagaricus gongylophorus</i>    |                |              |               |                     |                      |                    |                    |                    |                    |               |                 |                  |                 |                          |                    |            |               |         |                                  |                       |                           |                  |                                 |            |                  |             | 1                           |
| <i>Marasmius fiardii</i>              |                |              |               | 2                   |                      | 3                  |                    |                    | 5                  |               |                 |                  |                 | 1                        |                    |            |               |         |                                  | 4                     |                           |                  |                                 |            |                  |             | 18                          |
| <i>Mycena galopus</i>                 | 5              |              |               |                     |                      | 5                  |                    |                    |                    | 2             |                 |                  | 19              |                          | 1                  | 16         | 2             | 1       | 1                                | 2                     | 1                         |                  |                                 | 3          | 8                | 5           | 71                          |
| <i>Polyporus arcularius</i>           |                |              |               |                     |                      |                    |                    |                    |                    |               |                 |                  |                 |                          | 1                  |            |               | 2       |                                  |                       |                           |                  |                                 |            |                  |             | 5                           |
| <i>Psilocybe serbica</i>              |                |              |               |                     | 2                    | 2                  |                    |                    | 2                  |               |                 |                  | 4               | 4                        |                    | 2          | 1             | 1       | 1                                |                       | 3                         |                  | 1                               |            | 4                | 1           | 28                          |
| <i>Pterula gracilis</i>               |                |              |               |                     |                      | 1                  |                    |                    |                    |               |                 | 1                |                 | 2                        | 1                  | 1          |               |         | 1                                |                       |                           |                  |                                 |            |                  |             | 7                           |
| <i>Sphaerobolus stellatus</i>         |                |              |               |                     |                      | 2                  | 7                  |                    |                    |               |                 |                  | 9               | 4                        |                    | 1          |               |         | 1                                |                       | 8                         |                  | 3                               | 1          | 3                | 1           | 40                          |
| <b>Generalist decayer</b>             | <b>0</b>       |              |               |                     |                      |                    |                    |                    |                    |               |                 |                  |                 |                          |                    |            |               |         |                                  |                       |                           |                  |                                 |            |                  |             |                             |
| <i>Pleurotus ostreatus</i>            | 2              |              |               |                     |                      |                    |                    |                    |                    |               |                 |                  | 3               | 2                        |                    | 4          |               |         |                                  |                       | 1                         |                  | 1                               | 1          |                  |             | 14                          |
| <i>Rhodosporidium toruloides</i>      |                |              |               |                     |                      |                    |                    |                    |                    |               |                 | 1                |                 |                          |                    |            |               |         |                                  |                       |                           |                  |                                 |            |                  |             | 1                           |
| <i>Serpula lacrymans</i>              |                |              |               |                     |                      | 1                  |                    |                    |                    |               |                 |                  | 2               |                          |                    |            |               |         |                                  |                       |                           | 1                | 3                               |            |                  |             | 7                           |
| <b>Wood decayer</b>                   | <b>0</b>       |              |               |                     |                      |                    |                    |                    |                    |               |                 |                  |                 |                          |                    |            |               |         |                                  |                       |                           |                  |                                 |            |                  |             |                             |
| <i>Auricularia subglabra</i>          |                |              |               |                     |                      |                    |                    |                    |                    |               |                 |                  | 17              | 4                        |                    |            | 5             | 1       |                                  | 1                     |                           | 1                |                                 |            |                  |             | 1                           |
| <i>Auriculariopsis ampla</i>          |                |              |               |                     |                      | 1                  |                    |                    |                    |               | 1               |                  |                 |                          |                    |            |               |         |                                  |                       |                           |                  |                                 | 3          |                  |             | 5                           |
| <i>Bjerkandera adusta</i>             |                |              |               |                     |                      | 6                  |                    |                    |                    |               | 1               | 1                | 7               |                          |                    |            | 2             |         |                                  | 1                     |                           |                  | 1                               |            |                  |             | 19                          |
| <i>Clavulina sp./Sistotrema</i>       |                |              |               |                     |                      |                    |                    |                    |                    |               |                 | 1                | 1               |                          |                    |            |               |         |                                  |                       |                           |                  | 2                               |            |                  |             | 5                           |

[illegible]

**Table S3 : Details of lectins identified in the genome of *Laccaria bicolor***

| Lectin class                                   | # | Mycocsm AC (score)                                                   | NCBI AC        | Protein name                                           |
|------------------------------------------------|---|----------------------------------------------------------------------|----------------|--------------------------------------------------------|
| Tectonin PropLec6B                             | 3 | Lacbi2:399271 (0.73)<br>Lacbi2:399270 (0.67)<br>Lacbi2:322629 (0.27) | XP_001876432.1 | tectonin 2                                             |
| Coprinus $\beta$ -trefoil lectin               | 3 | Lacbi2:330799 (0.48)<br>Lacbi2:327918 (0.42)<br>Lacbi2:691792 (0.25) | XP_001885184.1 | predicted protein [ <i>Laccaria bicolor</i> S238N-H82] |
| Galectin like                                  | 2 | Lacbi2:236913 (0.36)<br>Lacbi2:312069 (0.35)                         | XP_001883510.1 | galectin [ <i>Laccaria bicolor</i> S238N-H82]          |
| Physarium lectin                               | 2 | Lacbi2:381649 (0.39)<br>Lacbi2:322629 (0.39)                         | XP_001875654.1 | ricin-containing lipase tectonin-like                  |
| Oyster lectin                                  | 2 | Lacbi2:585014 (0.28)<br>Lacbi2:448672 (0.27)                         | XP_001880964.1 | predicted protein [ <i>Laccaria bicolor</i> S238N-H82] |
| Fungal fruit body lectin                       | 1 | Lacbi2:185716 (0.54)                                                 | XP_001885326.1 | predicted protein, partial                             |
| Boletus and Laetiporus $\beta$ -trefoil lectin | 1 | Lacbi2:318163 (0.30)                                                 | XP_001879265.1 | predicted protein [ <i>Laccaria bicolor</i> S238N-H82] |
| Cyanovirin like                                | 1 | Lacbi2:327824 (0.42)                                                 | XP_001881773.1 | predicted protein [ <i>Laccaria bicolor</i> S238N-H82] |
| P domain of calnexin and reticulon             | 1 | Lacbi2:399410 (0.50)                                                 | XP_001874124.1 | calnexin [ <i>Laccaria bicolor</i> S238N-H82]          |
| Ergic vip L type                               | 1 | Lacbi2:399414 (0.48)                                                 | XP_001888824.1 | ERGIC53, mannose lectin                                |
| P-type lectin like                             | 1 | Lacbi2:642707 (0.29)                                                 | XP_001874815.1 | predicted protein [ <i>Laccaria bicolor</i> S238N-H82] |
| PVL like PropLec7B                             | 1 | Lacbi2:692684 (0.67)                                                 | XP_001891161.1 | predicted protein, partial                             |

## References

1. Kohler, A.; Kuo, A.; Nagy, L.G.; Morin, E.; Barry, K.W.; Buscot, F.; Canbäck, B.; Choi, C.; Cichocki, N.; Clum, A., et al. Convergent losses of decay mechanisms and rapid turnover of symbiosis genes in mycorrhizal mutualists. *Nat. Genet.* **2015**, *47*, 410-415, doi:10.1038/ng.3223.
2. Martino, E.; Morin, E.; Grelet, G.-A.; Kuo, A.; Kohler, A.; Daghino, S.; Barry, K.W.; Cichocki, N.; Clum, A.; Dockter, R.B., et al. Comparative genomics and transcriptomics depict ericoid mycorrhizal fungi as versatile saprotrophs and plant mutualists. *New Phytol.* **2018**, *217*, 1213-1229, doi:10.1111/nph.14974.
3. Murat, C.; Payen, T.; Noel, B.; Kuo, A.; Morin, E.; Chen, J.; Kohler, A.; Krizsán, K.; Balestrini, R.; Da Silva, C., et al. Pezizomycetes genomes reveal the molecular basis of ectomycorrhizal truffle lifestyle. *Nat. Ecol. Evol.* **2018**, *2*, 1956-1965, doi:10.1038/s41559-018-0710-4.
4. Peter, M.; Kohler, A.; Ohm, R.A.; Kuo, A.; Krützmann, J.; Morin, E.; Arend, M.; Barry, K.W.; Binder, M.; Choi, C., et al. Ectomycorrhizal ecology is imprinted in the genome of the dominant symbiotic fungus *Cenococcum geophilum*. *Nat. Commun.* **2016**, *7*, 12662, doi:10.1038/ncomms12662.
5. Miyauchi, S.; Kiss, E.; Kuo, A.; Drula, E.; Kohler, A.; Sánchez-García, M.; Morin, E.; Andreopoulos, B.; Barry, K.W.; Bonito, G., et al. Large-scale genome sequencing of mycorrhizal fungi provides insights into the early evolution of symbiotic traits. *Nat. Commun.* **2020**, *11*, 5125, doi:10.1038/s41467-020-18795-w.
6. Basso, V.; Kohler, A.; Miyauchi, S.; Singan, V.; Guinet, F.; Simura, J.; Novak, O.; Barry, K.W.; Amirebrahimi, M.; Block, J., et al. An ectomycorrhizal fungus alters sensitivity to jasmonate, salicylate, gibberellin, and ethylene in host roots. *Plant Cell Environ* **2020**, *43*, 1047-1068, doi:10.1111/pce.13702.
